# Supplementary material for: Effect of MWCNT-modified graphite felts on hexavalent chromium removal in biocathode microbial fuel cells
Source: Royal Society of Chemistry journal article supplement (doi:10.1039/c7ra11696a), 2017-01-01
Supplement: c7ra11696a1.pdf [file c7ra11696a1.pdf]

## Supporting Information

### Effect of MWCNTs-modified graphite felts on hexavalent chromium removal in biocathode microbial fuel cells

Xiayuan Wu<sup>a,b</sup> · Xiaomin Xiong<sup>a</sup> · Gianluca Brunetti<sup>b</sup> · Xiaoyu Yong<sup>a</sup> · Jun Zhou<sup>a</sup> · Lijuan

Zhang<sup>a</sup> · Ping Wei<sup>a</sup> · Honghua Jia<sup>a,\*</sup>

<sup>a</sup>Bioenergy Research Institute, College of Biotechnology and Pharmaceutical Engineering,  
Nanjing Tech University, Nanjing 211816, China

<sup>b</sup>Future Industries Institute, School of Natural and Built Environments, University of South  
Australia, Adelaide, South Australia 5095, Australia

**\*Corresponding author:**

Honghua Jia

Nanjing Tech University, No.30 Puzhu Road(S), Nanjing, 211816, Jiangsu, P.R. China

**Tel./Fax:** +86 25 58139929

**E-mail:** hhjia@njtech.edu.cn

TEXT (1)

FIGURES (3)

PAGES (5)

## Calculations

1. Total coulombs transferred ( $C_t$ ): 
$$C_t = \int_0^t I dt$$

where,  $I$  is the current and  $t$  is the total time of current flow.

2. Total coulombs required ( $C_r$ ) for the reduction of Cr(VI) to Cr(III):

$$C_r = \frac{nFVc}{M}$$

where,  $n$  is the number of electrons involved in Cr(VI) reduction (3 moles/mol),  $F$  is the Faraday constant (96,485.3 Coulombs/mol),  $V$  is the volume of the catholyte (L),  $c$  is the concentration of Cr(VI) (g/L) and  $M$  is the molecular weight of chromium (52 g/mol).

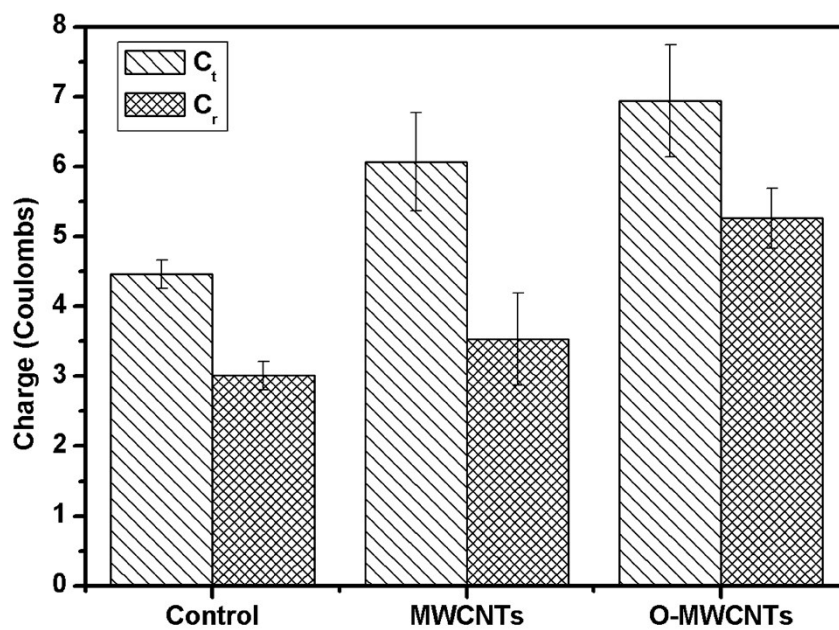

**Fig. S1.** The comparison of the total coulombs transferred ( $C_t$ ) and coulombs required ( $C_r$ ) for the reduction of Cr(VI) in the different MFCs at the end of 10 h operation time.

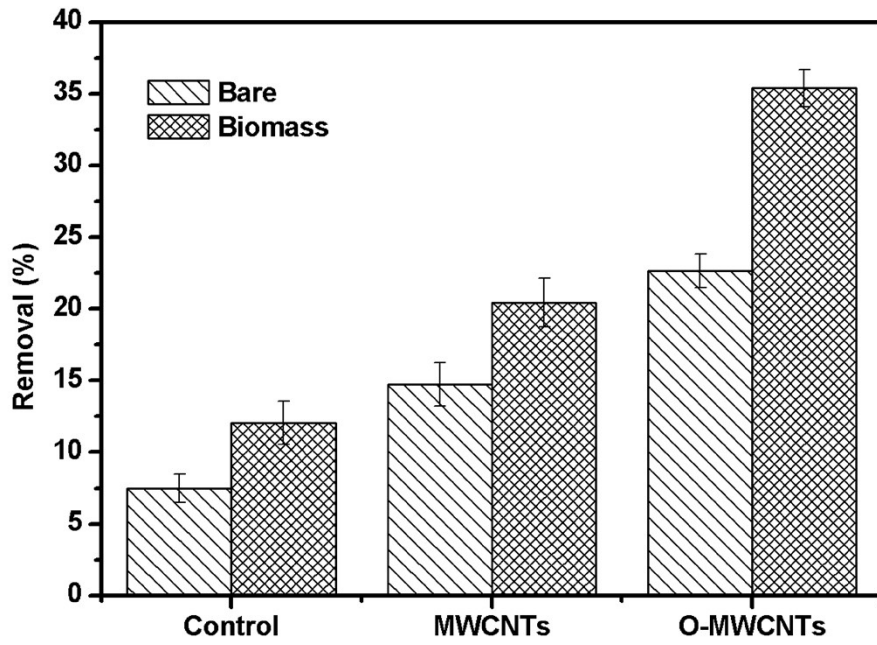

**Fig. S2.** The Cr(VI) removal of the three electrodes with and without biomass after 24h-adsorption experiment.

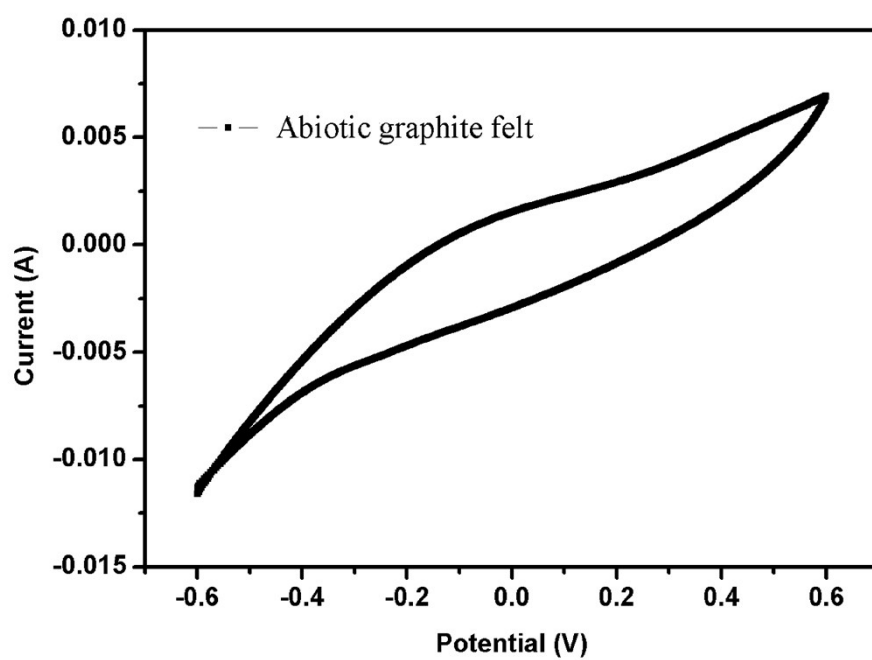

**Fig. S3.** Cyclic voltammogram of the abiotic graphite felt in a MFC (vs. Ag/AgCl, scan rate of 5 mV/s over the range -600 mV to +600 mV).
